# Supplementary material for: 1,1′-Bis-(diphenylphosphino)ferrocene appended d8- and d10-configuration based thiosquarates: the molecular and electronic configurational insights into their sensitization and co-sensitization properties for dye sensitized solar cells
Source: Royal Society of Chemistry journal article supplement (doi:10.1039/d4dt00151f), 2024-01-01
Supplement: d4dt00151f1.pdf [file d4dt00151f1.pdf]

# 1,1'-bis-(diphenylphosphino)ferrocene appended d8- and d10-configuration based thiosquarates: The molecular and electronic configurational insights into their sensitization and co-sensitization properties for dye sensitized solar cells

Aparna Kushwaha,<sup>a</sup> Devyani Srivastava,<sup>a</sup> Om Prakash,<sup>a</sup> Gabriele Kociok-Köhn,<sup>b</sup> Suresh W. Gosavi,<sup>c</sup> Ratna Chauhan,<sup>d\*</sup> Mohd. Muddassir<sup>d</sup> and Abhinav Kumar<sup>a\*</sup>

<sup>a</sup> Department of Chemistry, Faculty of Science, University of Lucknow, Lucknow 226 007, India

Email: [kumar\\_abhinav@lkouniv.ac.in](mailto:kumar_abhinav@lkouniv.ac.in) (AK); Telephone: +91-9451891030; Fax: +91-542-2367545

<sup>b</sup> Materials and Chemical Characterisation Facility (MC<sup>2</sup>), University of Bath, Claverton Down, Bath, BA2 7AY, UK

<sup>c</sup>Department of Physics, Savitribai Phule Pune University, Pune-411007, India

<sup>e</sup>Department of Environmental Science, Savitribai Phule Pune University, Pune-411007, India. Email: [ratnasingh.bhu@gmail.com](mailto:ratnasingh.bhu@gmail.com); Telephone: +91-8600121972; Fax: +91-20-25691684

<sup>f</sup>Department of Chemistry, College of Sciences, King Saud University, Riyadh 11451, Saudi Arabia

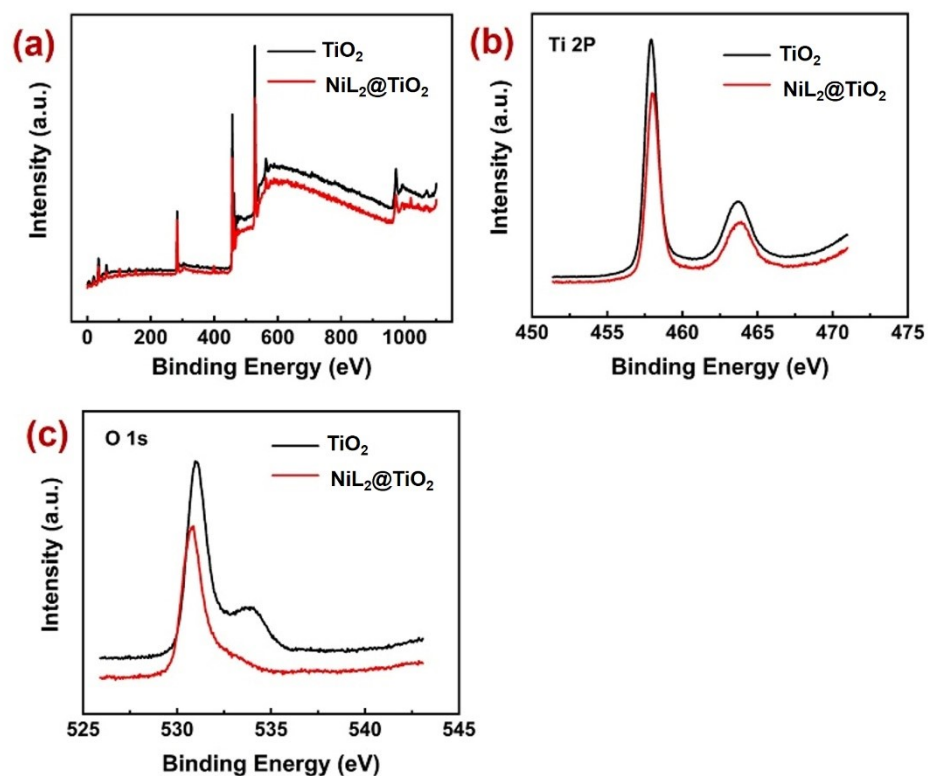

**Fig. S1** XPS results for TiO<sub>2</sub> and NiL<sub>2</sub>@TiO<sub>2</sub> (a) Full; (b) deconvoluted Ti 2p; (c) deconvoluted O1s.

**Table S1** DSSC performances of some previously reported co-sensitizers.

| Dyes                            | J <sub>sc</sub><br>(mA.cm <sup>-2</sup> ) | V <sub>oc</sub><br>(V) | FF          | η(%)        | IPCE<br>(%) | Ref |
|---------------------------------|-------------------------------------------|------------------------|-------------|-------------|-------------|-----|
| <b>Zn/N719</b>                  | 12.90±0.03                                | 0.750±0.002            | 0.73±0.01   | 7.10±0.02   | 47±1        |     |
| <b>Hg/N719</b>                  | 11.98±0.04                                | 0.730±0.002            | 0.73±0.01   | 6.38±0.04   | 39±1        | 1   |
| <b>Cd/N719</b>                  | 12.35±0.03                                | 0.740±0.003            | 0.73±0.01   | 6.68±0.03   | 42±1        |     |
| <b>ZnL/N719/TiO<sub>2</sub></b> | 14.46                                     | 0.74                   | 0.62        | 6.65        | 42          | 2a  |
| <b>CdL/N719/TiO<sub>2</sub></b> | 14.35                                     | 0.73                   | 0.60        | 6.30        | 41          |     |
| <b>HgL/N719/TiO<sub>2</sub></b> | 13.92                                     | 0.70                   | 0.61        | 5.96        | 40          |     |
| <b>1/N719/TiO<sub>2</sub></b>   | 17.99                                     | 0.70                   | 0.61        | 7.68        | 82          | 2b  |
| <b>4/N719/TiO<sub>2</sub></b>   | 16.69                                     | 0.71                   | 0.58        | 6.85        | 79          |     |
| <b>1/N719/TiO<sub>2</sub></b>   | 17.48                                     | 0.75                   | 0.63        | 8.27        | -           |     |
| <b>2/N719/TiO<sub>2</sub></b>   | 17.39                                     | 0.74                   | 0.60        | 7.73        | -           | 2c  |
| <b>2-Py-Zn/N719</b>             | 10.43                                     | -0.727                 | 0.63        | 4.80        | 39          |     |
| <b>3-Py-Zn/N719</b>             | 10.93                                     | -0.736                 | 0.63        | 5.06        | 41          | 2d  |
| <b>4-Py-Zn/N719</b>             | 14.08                                     | -0.727                 | 0.64        | 6.52        | 44          |     |
| <b>N719/Zn-Fc</b>               | 11.25 ± 0.06                              | 0.776 ± 0.02           | 0.65 ± 0.02 | 5.71 ± 0.04 | 63 ± 2      |     |
| <b>N719/Cd-Fc</b>               | 10.15 ± 0.04                              | 0.758 ± 0.03           | 0.65 ± 0.01 | 5.00 ± 0.05 | 59 ± 1      | 3   |
| <b>N719/Hg-Fc</b>               | 9.38 ± 0.06                               | 0.742 ± 0.02           | 0.66 ± 0.01 | 4.57 ± 0.03 | 57 ± 1      |     |

### Computational Details

To ascertain the electronic nature of all the sensitizers, density functional theory (DFT) calculations were performed. The molecular geometries of all the five sensitizers were optimized using the B3LYP exchange-correlation functional.<sup>[4]</sup> The MDF10 basis set for Fe,

Ni and Zn, while CEP-121G basis set was used for Cd while 6-31G\*\* basis set for other atomic centers were employed to execute geometry optimization. These optimized structures were used for the time-dependent density functional theory (TD-DFT) calculations for first 30 vertical excitation were executed using CAM-B3LYP functional and polarised continuum model (PCM) having solvent parameters of dichloromethane. Also, TiO<sub>2</sub> cluster, (TiO<sub>2</sub>)<sub>30</sub>@sensitizers were optimized and the starting coordinates were taken from the relaxed geometry of (TiO<sub>2</sub>)<sub>30</sub> cluster and sensitizers. All calculations were performed using the Gaussian 09 program.<sup>[5]</sup> In order to obtain the density of states plots for sensitizers, (TiO<sub>2</sub>)<sub>30</sub> cluster and (TiO<sub>2</sub>)<sub>30</sub>@3-Py-Ni GaussSum 3.1 was used.<sup>[6]</sup>

1. R. Yadav, M. Trivedi, G. Kociok-Köhn, R. Chauhan, A. Kumar and S.W. Gosavi, *Eur. J. Inorg. Chem.*, 2016, **6**, 1013-1021.
2. (a) L. Wie, Y. Yang, F. Fan, Y. Na, P. Wang, Y. Dong, B. Yang and W. Cao, *Dalton Trans.*, 2014, **43**, 11361; (b) S. Gao, R. Q. Fan, X. M. Wang, L. S. Qiang, L. G. Wei, P. Wang, H. J. Zhang, Y. L. Yang and Y. L. Wang, *J. Mat. Chem. A*, 2015, **3**, 6053-6063; (c) S. Gao, R. Q. Fan, X. M. Wang, L. S. Qiang, L. G. Wei, P. Wang, Y. L. Yang and Y. L. Wang, *Dalton Trans.*, 2015, **44**, 18187-18195; (d) M. Muddassir, A. Alarifi, A. A. Y. Abduh and M. Afzal, *J. Mol. Struc.*, 2021, **1246**, 131191.
3. C. Gautam, A. Singh, S. W. Gosavi, R. Chauhan, V. K. Sharma, A. Alarifi, M. Afzal, M. Muddassir and A. Kumar, *App. Organomet. Chem.*, 2022, **36**, e6608.
4. (a) A. D. Becke, *J. Chem. Phys.*, **1993**, *98*, 5648; (b) C. T. Lee, W. T. Yang, R. G. Parr, *Phys. Rev. B: Condens. Matter Mater. Phys.*, **1998**, *37*, 1133.
5. M. J. Frisch, G. W. Trucks, H. B. Schlegel, G. E. Scuseria, M. A. Robb, J. R. Cheeseman, J. A. Montgomery, T. Vreven Jr., K. N. Kudin, J. C. Burant, J. M. Millam, S. S. Iyengar, J. Tomasi, V. Barone, B. Mennucci, M. Cossi, G. Scalmani, N. Rega, G. A. Petersson, H. Nakatsuji, M. Hada, M. Ehara, K. Toyota, R. Fukuda, J. Hasegawa, M. Ishida, T. Nakajima, Y. Honda, O. Kitao, H. Nakai, M. Klene, X. Li, J. E. Knox, H. P. Hratchian, J. B. Cross, V. Bakken, C. Adamo, J. Jaramillo, R. Gomperts, R. E. Stratmann, O. Yazyev, A. J. Austin, R. Cammi, C. Pomelli, J. W. Ochterski, P. Y. Ayala, K. Morokuma, G. A. Voth, P. Salvador, J. J. Dannenberg, V. G. Zakrzewski, S. Dapprich, A. D. Daniels, M. C. Strain, O. Farkas, D. K. Malick, A. D. Rabuck, K. Raghavachari, J. B. Foresman, J. V. Ortiz, Q. Cui, A. G. Baboul, S. Clifford, J. Cioslowski, B. B. Stefanov, G. Liu, A. Liashenko, P. Piskorz, I. Komaromi, R. L. Martin, D. J. Fox, T. Keith, M. A. Al-Laham, C. Y. Peng, A. Nanayakkara, M. Challacombe, P. M. W. Gill, B. Johnson, W. Chen, W.

M. Wong, C. Gonzalez, J. A. Pople, *Gaussian 09* (Gaussian, Inc., Wallingford CT, revision B.01 **2009**).

6. N. M. O'Boyle, A. L. Tenderholt, K. M. Langner, *J. Comp. Chem.*, **2008**, 29, 839-845.
